# Supplementary material for: Acute kidney injury associated with endurance events—is it a cause for concern? A systematic review
Source: PubMed Central journal article supplement — BMJ Open Sport Exerc Med. 2017 Jun 14;3(1):e000093. doi: 10.1136/bmjsem-2015-000093 (PMC5731225; doi:10.1136/bmjsem-2015-000093), 2017-06-14
Supplement: bmjsem-2015-000093supp002.pdf [file bmjsem-2015-000093supp002.pdf]

## Appendix

| Line | MEDLINE, EMBASE Search 28 October 2015                                                                                                                                                                                                            | Articles |
|------|---------------------------------------------------------------------------------------------------------------------------------------------------------------------------------------------------------------------------------------------------|----------|
| 2    | AKI.ti,ab                                                                                                                                                                                                                                         | 4646     |
| 3    | (acute AND kidney AND injury).ti,ab                                                                                                                                                                                                               | 11204    |
| 4    | (Acute AND renal AND failure).ti,ab                                                                                                                                                                                                               | 31204    |
| 5    | renal.ti,ab                                                                                                                                                                                                                                       | 474488   |
| 6    | Marathon.ti,ab                                                                                                                                                                                                                                    | 2583     |
| 7    | (Endurance AND events).ti,ab                                                                                                                                                                                                                      | 745      |
| 8    | 2 OR 3 OR 4 OR 5 AND 6 OR 7<br>[Limit to: (Document type Case Reports or Classical<br>Article or Comparative Study or Controlled Clinical<br>Trial or Journal Article or Observational Study) and<br>(Language English) and (Age group Adult) and | 12,388   |
| 9    | Humans]                                                                                                                                                                                                                                           | 1,611    |

## Medline, EMBASE search

| AKIN staging |                                                                                                                                | RIFLE                    |                                                                                                                  | KDIGO |                                                                            | Urine output<br>(common to<br>all 3)                  |
|--------------|--------------------------------------------------------------------------------------------------------------------------------|--------------------------|------------------------------------------------------------------------------------------------------------------|-------|----------------------------------------------------------------------------|-------------------------------------------------------|
| Stage        | SCr                                                                                                                            | Class                    | SCr or GFR                                                                                                       | Stage | SCr                                                                        |                                                       |
| 1            | Increase of $\geq 26.5 \mu\text{mol/l}$ or increase 150% to 200% (1.5- to 2-fold) from baseline                                | Risk                     | Increase in SCr $\times 1.5$ or GFR decrease $>25\%$                                                             | 1     | Increase of $\geq 26.5 \mu\text{mol/l}$ or increase 150-200% from baseline | $<0.5 \text{ ml/kg/hr}$ $>6$ hrs                      |
| 2            | Increased to more than 200% to 300% baseline                                                                                   | Injury                   | SCr $\times 2$ or GFR decreased $>50\%$                                                                          | 2     | Increased to 200-300% from baseline                                        | $<0.5 \text{ ml/kg/hr}$ $>12$ hrs                     |
| 3            | Increased to more than 300% baseline, or $\geq 354 \mu\text{mol/l}$ with an acute increase $\geq 44 \mu\text{mol/l}$ or on RRT | Failure                  | SCr $\times 3$ , or SCr $>354 \mu\text{mol/l}$ with an acute rise $>44 \mu\text{mol/l}$ or GFR decreased $>75\%$ | 3     | Increased $>300\%$ from baseline, or $\geq 354 \mu\text{mol/l}$ or on RRT  | $<0.3 \text{ ml/kg/hr}$ $>24$ hrs or anuria $>12$ hrs |
|              |                                                                                                                                | Loss                     | Persistent acute renal failure = complete loss of kidney function $>4$ weeks                                     |       |                                                                            |                                                       |
|              |                                                                                                                                | End-stage kidney disease | ESRD $>3$ months                                                                                                 |       |                                                                            |                                                       |

AKIN, RIFLE & KDIGO AKI stages. For AKIN, the increase in creatinine must occur in  $<48$  hours. For RIFLE, AKI should be both abrupt (within 1–7 days) and sustained (more than 24 hours). Adapted from AKIN, RIFLE, KDIGO definitions.[23 24 121] GFR – glomerular filtration rate, SCr – serum creatinine.
